# Supplementary material
Source: PubMed Central journal article supplement (PMC6965967)
Supplement: ijcep0010-9607-f4.pdf [file ijcep0010-9607-f4.pdf]

## Rap2A and HCC

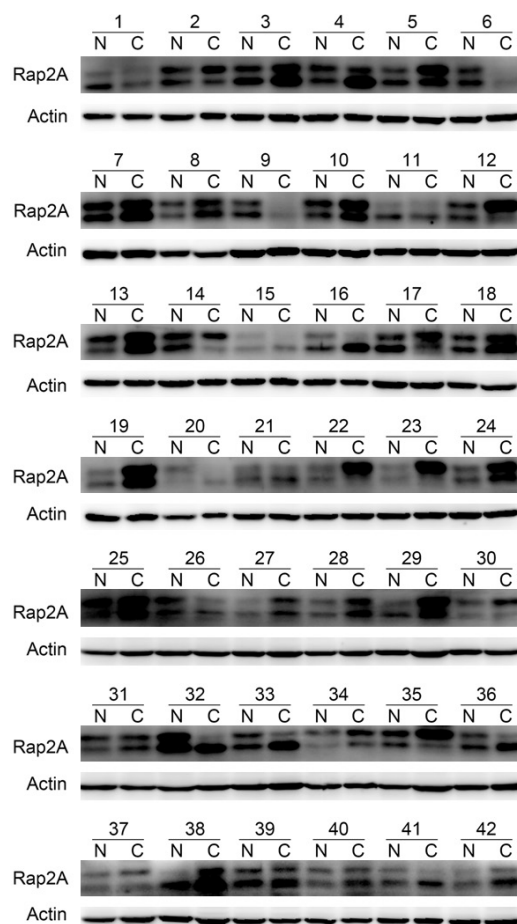

**Figure S1.** Expression of Rap2A protein in 42 paired HCC.

## Rap2A and HCC

**Table S1.** Western blot band grayscale from 42 paired HCC tissues and adjacent normal liver tissues

| Case | Actin normal | Rap2A normal | (Rap2A/ $\beta$ -Actin)<br>normal | Actin cancer | Rap2A cancer | (Rap2A/ $\beta$ -Actin)<br>cancer |
|------|--------------|--------------|-----------------------------------|--------------|--------------|-----------------------------------|
| 1    | 176.129      | 50.346       | 0.285847305                       | 166.08       | 22.969       | 0.138300819                       |
| 2    | 160.06       | 74.038       | 0.462564038                       | 169.373      | 62.017       | 0.366156353                       |
| 3    | 233.5        | 72.94        | 0.312376874                       | 224.29       | 100.749      | 0.44919078                        |
| 4    | 174.927      | 65.59        | 0.37495641                        | 168.201      | 83.11        | 0.494111212                       |
| 5    | 168.365      | 58.962       | 0.350203427                       | 160.431      | 77.011       | 0.480025681                       |
| 6    | 151.668      | 63.57        | 0.419139172                       | 162.941      | 28.179       | 0.172939898                       |
| 7    | 228.984      | 107.184      | 0.468085106                       | 230.811      | 129.902      | 0.562806799                       |
| 8    | 165.654      | 71.462       | 0.431393145                       | 169.964      | 111.539      | 0.656250735                       |
| 9    | 195.969      | 96.13        | 0.490536769                       | 189.245      | 27.531       | 0.145478084                       |
| 10   | 166.366      | 84.115       | 0.505602106                       | 167.35       | 137.282      | 0.820328653                       |
| 11   | 152.464      | 51.444       | 0.337417358                       | 168          | 45.518       | 0.270940476                       |
| 12   | 163.544      | 66.024       | 0.403707871                       | 149.079      | 91.389       | 0.613023967                       |
| 13   | 144.006      | 96.278       | 0.668569365                       | 143.502      | 139.928      | 0.975094424                       |
| 14   | 169.941      | 96.451       | 0.567555799                       | 149.014      | 66.24        | 0.444521991                       |
| 15   | 171.603      | 27.349       | 0.159373671                       | 170.189      | 22.932       | 0.134744314                       |
| 16   | 164.61       | 61.072       | 0.371010267                       | 150.079      | 84.994       | 0.5663284                         |
| 17   | 172.811      | 118.549      | 0.686003784                       | 167.027      | 103.687      | 0.620779874                       |
| 18   | 168.7        | 89.676       | 0.531570836                       | 150.52       | 125.89       | 0.83636726                        |
| 19   | 172.212      | 49.705       | 0.288626809                       | 181.313      | 102.664      | 0.566225257                       |
| 20   | 132.769      | 27.403       | 0.206396071                       | 151.829      | 22.86        | 0.150564121                       |
| 21   | 172.267      | 50.04        | 0.290479314                       | 160.613      | 39.132       | 0.243641548                       |
| 22   | 154.639      | 37.873       | 0.244912344                       | 158.797      | 99.938       | 0.629344383                       |
| 23   | 134.078      | 31.16        | 0.232402035                       | 160.134      | 116.873      | 0.729845005                       |
| 24   | 167.186      | 56.042       | 0.335207493                       | 122.989      | 111.493      | 0.906528226                       |
| 25   | 151.357      | 53.727       | 0.354968716                       | 147.385      | 63.111       | 0.428205041                       |
| 26   | 167.668      | 44.954       | 0.268113176                       | 163.086      | 34.274       | 0.210159057                       |
| 27   | 161.942      | 33.385       | 0.206154055                       | 173.489      | 54.628       | 0.314878753                       |
| 28   | 154.571      | 36.835       | 0.238304727                       | 163.83       | 87.261       | 0.532631386                       |
| 29   | 157.208      | 56.819       | 0.361425627                       | 160.937      | 84.994       | 0.528119699                       |
| 30   | 143.239      | 25.364       | 0.177074679                       | 144.528      | 61.665       | 0.426664729                       |
| 31   | 163.446      | 68.204       | 0.417287667                       | 143.94       | 75.691       | 0.525851049                       |
| 32   | 149.077      | 109.007      | 0.731212729                       | 158.484      | 66.397       | 0.418950809                       |
| 33   | 152.608      | 59.872       | 0.392325435                       | 154.264      | 94.177       | 0.610492403                       |
| 34   | 143.648      | 35.216       | 0.245154823                       | 146.095      | 72.359       | 0.495287313                       |
| 35   | 210.827      | 92.133       | 0.437007594                       | 218.636      | 120.39       | 0.550641248                       |
| 36   | 167.242      | 82.32        | 0.492220854                       | 155.044      | 71.327       | 0.460043601                       |
| 37   | 142.913      | 54.286       | 0.379853477                       | 139.856      | 49.642       | 0.354950807                       |
| 38   | 235.988      | 102.268      | 0.433361018                       | 225.639      | 128.713      | 0.570437735                       |
| 39   | 135.392      | 96.416       | 0.712124793                       | 132.788      | 85.736       | 0.645660752                       |
| 40   | 133.929      | 49.813       | 0.371935876                       | 127.883      | 66.638       | 0.52108568                        |
| 41   | 135.897      | 46.924       | 0.345290919                       | 148.715      | 72.291       | 0.486104293                       |
| 42   | 149.668      | 55.483       | 0.370707165                       | 151.463      | 87.964       | 0.580762298                       |
